# Supplementary material
Source: publisher site journal article supplement (https://www.dovepress.com/article/151339)
Supplement: Supplementary file 1 [file get_supplementary_file.php%3Ff%3D151339.pdf]

## Supplementary materials

Table S1 International Classification of Disease (ICD) version 9 and HMO internal diagnoses codes used to identify IBD-related contacts.

| Diagnosis                                                  | Clalit  | Maccabi       | Meuhedet               | Leumit  |
|------------------------------------------------------------|---------|---------------|------------------------|---------|
| CROHN'S DISEASE - REGIONAL ENTERITIS                       | 555     | 555           | 8079                   | 555     |
| REGIONAL ENTERITIS OF SMALL INTESTINE                      | 555     | 555.0, Y15123 | 21494, 8080            | 555     |
| ILEITIS                                                    | 555     |               |                        | 555     |
| REGIONAL ILEITIS                                           | 555.001 |               | 21493                  | 555.001 |
| SEGMENTAL ILEITIS                                          | 555.002 |               |                        | 555.002 |
| TERMINAL ILEITIS                                           | 555.003 | Y15124        | 21495                  | 555.003 |
| REGIONAL ENTERITIS                                         | 555.01  |               | 21507                  | 555.01  |
| REGIONAL ENTERITIS OF DUODENUM                             | 555.011 |               |                        | 555.011 |
| REGIONAL ENTERITIS OF ILEUM                                | 555.012 |               |                        | 555.012 |
| REGIONAL ENTERITIS OF JEJUNUM                              | 555.013 |               |                        | 555.013 |
| REGIONAL ENTERITIS OF LARGE INTESTINE                      | 555.1   | 555.1, Y15125 | 21497, 8081            | 555.1   |
| COLITIS GRANULOMATOUS                                      | 555.101 |               |                        | 555.101 |
| REGIONAL ENTERITIS OF SMALL INTESTINE WITH LARGE INTESTINE | 555.2   | 555.2, Y15127 | 21500                  | 555.2   |
| REGIONAL ILEOCOLITIS                                       | 555.2   | 555.2, Y15127 | 21501                  | 555.2   |
| COLLAGENOUS AND LYMPHOCITIC COLITIS OF COLON               | 555.31  |               |                        | 555.31  |
| COLLAGENOUS AND LYMPHOCYTIC COLITIS OF LARGE BOWEL         | 555.32  |               |                        | 555.32  |
| COLLAGENOUS AND LYMPHOCYTIC COLITIS OF LARGE BOWEL         | 555.33  |               |                        | 555.33  |
| REGIONAL ENTERITIS OF UNSPECIFIED SITE                     | 555.9   | 555.9, Y15131 | 8083                   | 555.9   |
| ULCERATIVE ENTEROCOLITIS                                   | 556     | 556, Y15143   |                        | 556     |
| ULCERATIVE ENTEROCOLITIS                                   | 556     | 556           |                        | 556     |
| ULCERATIVE ILEOCOLITIS                                     | 556.1   |               |                        | 556.1   |
| ULCERATIVE PROCTITIS                                       | 556.2   | 556.2, Y21353 | 21514                  | 556.2   |
| ULCERATIVE PROCTOSIGMOIDITIS                               | 556.3   |               |                        | 556.3   |
| PSEUDOPOLYPOSIS OF COLON                                   | 556.4   |               |                        | 556.4   |
| ULCERATIVE COLITIS, LEFT-SIDED                             | 556.5   | Y15143        | 21516, 21510           | 556.5   |
| ULCERATIVE COLITIS, UNIVERSAL                              | 556.6   | Y15143        | 21516, 21510           | 556.6   |
| ULCERATIVE COLITIS, OTHER                                  | 556.8   | Y15143        | 21516, 21510           | 556.8   |
| ULCERATIVE COLITIS, UNSPECIFIED                            | 556.9   | Y15143        | 21516, 21510           | 556.9   |
| CROHN'S DISEASE                                            | 556.91  |               | 21516, 21510           | 556.91  |
| CROHN'S DISEASE ARTHROPATHY                                |         | Y16910        |                        |         |
| INFLAMMATORY BOWEL DISEASE CHRONIC                         |         | Y15135        |                        |         |
| FISTULA COMPLICATING CROHN'S DISEASE                       |         | Y15132        | 21505, 21503           |         |
| SACROILEITIS COMPLICATING CROHN'S DISEASE                  |         | 713.15        | 21509                  |         |
| PROCTOCOLITIS IDIOPATHIC                                   |         | Y15140, 556.9 | 21513, 21515 ,<br>8084 |         |
| PROCTITIS UNS                                              |         | Y15251        |                        |         |
| ULCERATIVE COLITIS ARTHROPATHY                             |         | Y16913        |                        |         |
| EPISCLERITIS IN CROHN'S/COLITIS                            |         | Y13660        |                        |         |
| ERYTHEMA NODOSUM IN CROHN'S/COLITIS                        |         | Y16454        |                        |         |
| ARTHROPATHY INFLAMMATORY BOWEL DISEASE                     |         | Y16909        |                        |         |
| ARTHRITIS ASSOCIATED WITH INFLAMMATORY BOWEL DISEASES      |         | Y23152        |                        |         |
| CROHN'S DISEASE SCLEROSING CHOLANGITIS                     |         | Y15354        |                        |         |

Table S2 Israeli drug catalogue codes (YARPA) and HMO internal codes used to identify IBD-related medications

| Type                       | Name                           | Clalit       | Maccabi      | Meuhedet | Leumit |
|----------------------------|--------------------------------|--------------|--------------|----------|--------|
| 5-aminosalicylic acid      | ASACOL 20 SUPPS                | 57656        | 57656        | 57656    |        |
|                            | ASACOL 400 MG 100 TAB          | 7858         | 7858         | 7858     | 7858   |
|                            | ASACOL 800 MG 60 TAB           | 69522        | 69522        | 69522    | 69522  |
|                            | DIPENTUM 250MG 100TAB          | 8044         | 8044         |          |        |
|                            | DIPENTUM 250MG 112TAB          | 91470        | 91470        |          |        |
|                            | PENTASA 1 GR 28 SUPP           | 8879         | 8879         | 8879     | 8879   |
|                            | PENTASA 500 MG 100 TAB         | 8993         | 8993         | 8993     | 8993   |
|                            | PENTASA SR 1 G 60 TAB          | 24200        | 24200        | 24200    | 24200  |
|                            | PENTASA SR 250MGX100TAB        | 7982         | 7982         |          |        |
|                            | PENTASA SR GRANULES 2G*60      | 89247        | 89247        | 89247    | 89247  |
|                            | PENTASA SR SACHETS 100 S       | 20492        | 20492        | 20492    | 20492  |
|                            | RAFASSAL 1 GR 15 SUPP          | 9254         | 9254         | 9254     | 9254   |
|                            | RAFASSAL 1 GR 30 CAPL          | 9126         | 9126         | 9126     | 9126   |
|                            | RAFASSAL 250 MG 100 R          | 2520         | 2520         | 2520     | 2520   |
|                            | RAFASSAL 250 MG 30 SUPP        | 2519         | 2519         | 2519     | 2519   |
|                            | RAFASSAL 500 MG 30 SUPP        | 8300         | 8300         | 8300     | 8300   |
|                            | RAFASSAL 500 MG 60 TAB         | 8275         | 8275         | 8275     | 8275   |
|                            | RAFASSAL GRAN.SACH 1 gr 50     | 76624        |              |          |        |
|                            | RAFASSAL GRAN.SACH 1.5gr 50    | 76625        |              |          |        |
|                            | RAFASSAL GRAN.SACH 3gr 50      | 76634        |              |          |        |
| SALAZOPYRIN 100 TAB        | 1936                           | 1936         | 1936         | 1936     |        |
| SALAZOPYRIN 500mg 100 TAB  | 26717                          | 26717        | 26717        | 26717    |        |
| SALAZOPYRIN 0.5 gr 100 TAB | 1937                           | 1937         | 1937         | 1937     |        |
| Thiopurines                | AZATHIOPRINE                   | 7859, 90363  | 7859, 90363  |          |        |
|                            | AZOPI 50 MG 100 TAB            | 8470         | 8470         | 8470     | 8470   |
|                            | IMURAN 25 MG 100 TAB           | 7860         | 7860         | 7860     | 7860   |
|                            | IMURAN 50 MG 100 TAB           | 1020         | 1020         | 1020     | 1020   |
|                            | IMURAN 50 MG VIAL              | 26895, 92738 | 26895, 92738 |          |        |
|                            | MERCAPTOPYRINE 10MG/ML 15M SOL | 92221        | 92221        |          | 92221  |
|                            | PURI NETHOL 25 TAB             | 1907         | 1907         | 1907     | 1907   |
| Biologics                  | ENTYVIO VIAL 300 MG            | 66601        |              |          |        |
|                            | HUMIRA 40MG/0.8ML 2 SYR        | 11050        | 11050        | 11050    | 11050  |
|                            | HUMIRA PEN 40MG /0.4ML X2      | 73628        |              |          |        |
|                            | HUMIRA PEN X 2 UK/IRELAND      | 25123        | 25123        | 25123    | 25123  |
|                            | HUMIRA VIAL 40/0.8ML 2         | 31145        | 31145        | 31145    | 31145  |
|                            | HUMIRA PFS 40MG /0.4ML         | 73626        |              |          |        |
|                            | HUMIRA PEN IN CASE OF BREAKAGE | 93051        |              |          |        |
|                            | REMICADE 100 MG 1 VIA          | 23349        | 23349        | 23349    | 23349  |
|                            | REMICADE 10MG/ML 10ML          | 95464        | 95464        |          |        |
|                            | REMICADE 20MG/100ML            | 95460        | 95460        |          |        |
|                            | SIMPONI 50MG/ 0.5ML 1 SYRINGE  | 31568        |              |          |        |
|                            | SIMPONI AUTOIN 100 MG          | 85391        |              |          |        |
|                            | SIMPONI PRE FILLED PEN         | 29028        | 29028        | 29028    | 29028  |
| STELARA 45MG               | 21016                          |              |              |          |        |

|                             |                                |       |       |       |       |
|-----------------------------|--------------------------------|-------|-------|-------|-------|
|                             | STELARA 45MG/ 0.5ML            | 92284 |       |       |       |
|                             | STELARA 130 MG                 | 60533 |       |       |       |
|                             | STELARA 130 MG VIAL            | 93479 |       |       |       |
|                             | STELARA SYR 45MG               | 24037 |       |       |       |
|                             | STELARA PREFILL. SYR 90MG      | 66817 |       |       |       |
|                             | TYSABRI VIAL 300MG/15ML        | 16991 | 16991 |       | 16991 |
| 5-aminosalicylic acid enema | ASACOL 20 SUPPS 500MG          | 57656 |       |       |       |
|                             | PENTASA ENEMA 7                | 7900  | 7900  | 7900  | 7900  |
|                             | PENTASA 1GR 28SUP              | 8879  |       |       |       |
|                             | RAFASSAL ENEMA 1 GR 1=7        | 8078  | 8078  | 8078  | 8078  |
|                             | RAFASSAL ENEMA 4 G 1=7         | 7433  | 7433  | 7433  | 7433  |
|                             | RAFASSAL 250MG 30 SUP          | 2519  |       |       |       |
|                             | RAFASSAL 500MG 30SUP           | 8300  |       |       |       |
|                             | RAFASSAL 1GR 15SUP             | 9254  |       |       |       |
|                             | SALAZOPYRIN                    | 8104  |       |       |       |
|                             | SALAZOPYRIN EN 100 TAB         | 1937  | 1937  | 1937  | 1937  |
| Steroid enema               | BETAMETHASONE ENEMA 14         | 45319 |       |       |       |
|                             | BETAMETHASONE ENEMA 7          | 45320 |       |       |       |
|                             | BETAMETHASONE ENEMA 28         | 8210  |       |       |       |
|                             | BETNESOL RETENTION ENEMA 100ML | 91403 |       |       |       |
|                             | BETNESOL REKTAL 100ML 7ENEMA   | 92380 |       |       |       |
|                             | BETNISOL RETENTION ENEMA       | 92536 |       |       |       |
|                             | BETNISOL RETENTION ENEMA       | 94998 |       |       |       |
|                             | BETNESOL ENEMA 100ML 29-G      | 352   | 352   | 352   | 352   |
|                             | CORTIFOAM 15G                  | 27615 | 27615 | 27615 | 27615 |
|                             | ENTOCORT ENEMA 2MG 7 X 115ML   | 92634 |       |       |       |
|                             | ENTOCORT ENEMA 7BOTTLES        | 39056 | 39056 |       |       |
| Budesonide                  | CORTIMENT 9MG X 30TAB P.RELEAS | 38490 |       |       |       |
|                             | ENTOCORT 3MG 100 TAB           | 39055 |       |       |       |
|                             | BUDESONE 3MG 100 TAB           | 9525  |       |       |       |
| Modulen                     | MODULEN                        | 28714 | 28714 |       | 28714 |

Table S3 International Classification of Disease (ICD) version 9 and HMO internal procedure codes used to identify IBD related procedures.

| Procedure                                                      | Clalit | Maccabi      | Meuhedet | Leumit |
|----------------------------------------------------------------|--------|--------------|----------|--------|
| DIAGNOSTIC ESOPHAGOSCOPY                                       |        | 43200        |          |        |
| UPPER GASTROINTESTINAL TRACT ENDOSCOPY, WITH/WITHOUT BIOPSY    | 43235  | 43235, 43234 | 43235    |        |
| BALLOON ENDOSCOPY OF SMALL BOWEL                               | L3255  | L3255, 44360 | L3255    |        |
| DIAGNOSTIC FLEXIBLE COLONOSCOPY, WITH/WITHOUT BIOPSY           | L5378  | L5378, 45378 | L5378    |        |
| COLONOSCOPY WITH POLYPECTOMY                                   | 45383  | 45383        | 45383    |        |
| VIDEO CAPSULE                                                  |        | 76120        |          |        |
| REPEATED XRAYS OF ESOPHAGUS, STOMACH, DUODENUM AND SMALL BOWEL |        | 74245        |          |        |
| REPEATED XRAYS OF SMALL BOWEL WITH CONTRAST                    |        | 74249        | 74249    |        |

|                                                      |        |                 |                 |        |
|------------------------------------------------------|--------|-----------------|-----------------|--------|
| CHILDREN GASTROSCOPY                                 | 44.133 | 44.133          | 44.133          | 44.133 |
| GASTROSCOPY AND BIOPSY                               | 44.14  | 44.14           | 44.14           | 44.14  |
| ESOPHAGOGASTRODUODENOSCOPY [EGD] WITH CLOSED BIOPSY  | 45.16  | 45.16           | 45.16           | 45.16  |
| COLONOSCOPY [FLEXIBLE FIBEROPTIC]                    | 45.23  | 45.23           | 45.23           | 45.23  |
| SIGMOIDOSCOPY                                        | 45.24  | 45.24           | 45.24           | 45.24  |
| VIRTUAL COLONOSCOPY                                  |        |                 | L6375           | 11850  |
| CAPSULE                                              |        |                 | 76120           | 11851  |
| COLONOSCOPY +/- BIOPSY WITHOUT DOCTOR                |        |                 |                 | 11852  |
| COLONOSCOPY + BIOPSY                                 |        |                 |                 | 11858  |
| DIAGNOSTIC COLONOSCOPY +/- BIOPSY                    |        |                 |                 | 11859  |
| MRE                                                  | 74181  | 74181           | 74181           | 33100  |
| XRAY OF ESOPHAGUS, STOMACH, DUODENUM AND SMALL BOWEL |        | 74241,<br>74240 |                 | 34192  |
| SMALL BOWEL PASSAGE                                  |        |                 |                 | 34250  |
| UPPER GI TRACT ENDOSCOPY                             |        |                 |                 | 40100  |
| GASTROSCOPY WITHOUT DOCTOR                           |        |                 |                 | 40220  |
| PEDIATRIC GASTROSCOPY                                |        |                 |                 | 40228  |
| DIAGNOSTIC ENDOSCOPY OF THE SMALL BOWEL              |        |                 | 44360           | 40238  |
| DOUBLE BALLOON ENDOSCOPY OF THE SMALL BOWEL          |        |                 |                 | 40239  |
| SIGMOIDOSCOPY WITHOUT DOCTOR                         |        |                 |                 | 40410  |
| SIGMOIDOSCOPT +/- BIOPSY                             | 45331  | 45331,<br>45333 | 45331           | 40460  |
| COLONOSCOPY WITH POLYPECTOMY                         | 45383  | 45383           |                 | 40484  |
| COLONOSCOPY+ STENT                                   | 45387  | 45387           | 45387,<br>G00T4 | 40486  |
| DIAGNOSTIC PROCTOSIGMOIDOSCOPY                       |        |                 |                 | 40519  |

Table S4 Clinically relevant combinations used to construct 942 2x2 contingency tables to differentiate TP patients from TN subjects

| Variables                 | Combinations                                                                                                                                                                                                                                                                                                                                                                              |
|---------------------------|-------------------------------------------------------------------------------------------------------------------------------------------------------------------------------------------------------------------------------------------------------------------------------------------------------------------------------------------------------------------------------------------|
| <b>single variables</b>   |                                                                                                                                                                                                                                                                                                                                                                                           |
| GE visits                 | GE y/n<br>GE, at least 2 visits                                                                                                                                                                                                                                                                                                                                                           |
| procedures                | at least 1 of three procedures (proc3): colonoscopy (colono)/ sigmoidoscopy (sigmo)/ small bowel passage test (pas)<br>at least 2 of three procedures<br>new procedures y/n (at least one of the following: MRE/capsule)<br>gastroscopy y/n<br>at least one of 5 procedures (proc5): (colono/sigmo/pas/MRE/capsule)<br>at least one of 4 procedures (proc4): (colo/sigmo/pas/gastroscopy) |
| medications 6 months (6m) | at least one of 6 procedures (proc6): (colo/sigmo/pas/MRE/capsule/gastroscopy)<br>5ASA 6m<br>budeson 6m<br>steroids 6m<br>thiopurines (thiop) 6m<br>methotrexate (MTX) 6m                                                                                                                                                                                                                 |

|                                                                                         |                                                                                                                                                                                                                                                                                                                                                                                                                                                                                                                                                                                                                                                                                                                                                                                                                                                                                                 |
|-----------------------------------------------------------------------------------------|-------------------------------------------------------------------------------------------------------------------------------------------------------------------------------------------------------------------------------------------------------------------------------------------------------------------------------------------------------------------------------------------------------------------------------------------------------------------------------------------------------------------------------------------------------------------------------------------------------------------------------------------------------------------------------------------------------------------------------------------------------------------------------------------------------------------------------------------------------------------------------------------------|
| <p>Medications 3 months (3m)</p>                                                        | <p>biologics (bio) 6m<br/>         enema-steroids at least 2 purchases<br/>         enema-5ASA at least 2 purchases<br/>         enema-ANY at least 2 purchases<br/>         (5ASA/ budeson) 6m<br/>         (5ASA/ steroids) 6m<br/>         (5ASA/ thiop) 6m<br/>         (5ASA / thiop/ bio) 6m<br/>         (thiop/ bio) 6m<br/>         (thiop/ MTX) 6m<br/>         enema-ANY 2 purchases+ 5ASA 6m<br/>         enema-ANY 2 purchases + thiop 6m<br/>         5ASA 3m<br/>         budeson 3m<br/>         steroids 3m<br/>         thiop 3m<br/>         MTX for 3m<br/>         biologics 3m<br/>         (5ASA/ budeson) 3m<br/>         (5ASA/ steroids) 3m<br/>         (5ASA/ thiop) 3m<br/>         (5ASA / thiop/ bio) 3m<br/>         (thiop/ bio) 3m<br/>         (thiop/ MTX) 3m<br/>         enema-ANY 2 purchases+ 5ASA 3m<br/>         enema-ANY 2 purchases + thiop 3m</p> |
| <p>medications purchases (excluding steroids)</p>                                       | <p>at least 3 purchases<br/>         at least 6 purchases</p>                                                                                                                                                                                                                                                                                                                                                                                                                                                                                                                                                                                                                                                                                                                                                                                                                                   |
| <p><b>combinations</b></p>                                                              |                                                                                                                                                                                                                                                                                                                                                                                                                                                                                                                                                                                                                                                                                                                                                                                                                                                                                                 |
| <p>GE+ procedures</p>                                                                   | <p>GE y/n+ proc3 y/n<br/>         GE y/n+ proc4 y/n<br/>         GE y/n+ procs5 y/n<br/>         GE y/n+ procs6 y/n</p>                                                                                                                                                                                                                                                                                                                                                                                                                                                                                                                                                                                                                                                                                                                                                                         |
| <p>GE+ <b>1of 3</b> procedures (proc3)+meds <b>6m</b><br/>         (colo/sigmo/pas)</p> | <p>GE y/n+ proc3 y/n+5ASA 6m<br/>         GE y/n+ proc3 y/n+(5ASA/budeson 6m)<br/>         GE y/n+ proc3 y/n+(5ASA/steroids 6m)<br/>         GE y/n+ proc3 y/n+(5ASA/thiop 6m)<br/>         GE y/n+ proc3 y/n+(5ASA/thiop/bio 6m)<br/>         GE y/n+ proc3 y/n+thiop 6m<br/>         GE y/n+ proc3 y/n+(thiop/bio) 6m<br/>         GE y/n+ proc3+(thiop/MTX 6m)<br/>         GE y/n+ proc3 y/n+MTX 6m<br/>         GE y/n+ proc3 y/n+bio 6m<br/>         GE y/n+ proc3 y/n+budeson 6m<br/>         GE y/n+ proc3 y/n+enema-ANY 2 purchases<br/>         GE y/n+ proc3 y/n+(enema-ANY 2 purch+5ASA 6m)<br/>         GE y/n+ proc3 y/n+(enema-ANY 2 purch +thiop 6m)</p>                                                                                                                                                                                                                        |
| <p>GE+ 1of 3 procedures +meds <b>6 purchases</b></p>                                    |                                                                                                                                                                                                                                                                                                                                                                                                                                                                                                                                                                                                                                                                                                                                                                                                                                                                                                 |

GE+ 1 of 3 procedures +meds **3m**  
(colo/sigmo/pas)

GE y/n+ proc3 y/n+5ASA 3m  
GE y/n+ proc3 y/n+(5ASA/budeson 3m)  
GE y/n+ proc3 y/n+(5ASA/steroids 3m)  
GE y/n+ proc3 y/n+(5ASA/thiop 3m)  
GE y/n+ proc3 y/n+(5ASA/thiop/bio 3m)  
GE y/n+ proc3 y/n+thiop 3m  
GE y/n+ proc3 y/n+(thiop/bio) 3m  
GE y/n+ proc3+(thiop/MTX 3m)  
GE y/n+ proc3 y/n+MTX 3m  
GE y/n+ proc3 y/n+bio 3m  
GE y/n+ proc3 y/n+budeson 3m  
GE y/n+ proc3 y/n+(enema-ANY 2 purch+5ASA 3m)  
GE y/n+ proc3 y/n+(enema-ANY 2 purch +thiop 3m)

GE+ 1of 3 procedures +meds **3 purchases**  
GE+ **1of 5** procedures +meds **6m**  
(colo/sigmo/pas/MRE/capsule)

GE y/n+ proc5 y/n+5ASA 6m  
GE y/n+ proc5 y/n+(5ASA/budeson 6m)  
GE y/n+ proc5 y/n+(5ASA/steroids 6m)  
GE y/n+ proc5 y/n+(5ASA/thiop 6m)  
GE y/n+ proc5 y/n+(5ASA/thiop/bio 6m)  
GE y/n+ proc5 y/n+thiop 6m  
GE y/n+ proc5 y/n+(thiop/bio) 6m  
GE y/n+ proc5+(thiop/MTX 6m)  
GE y/n+ proc5 y/n+MTX 6m  
GE y/n+ proc5 y/n+bio 6m  
GE y/n+ proc5 y/n+budeson 6m  
GE y/n+ proc5 y/n+enema-ANY 2 purch  
GE y/n+ proc5 y/n+(enema-ANY 2 purch+5ASA 6m)  
GE y/n+ proc5 y/n+(enema-ANY 2 purch+thiop 6m)

GE+ 1of 5 procedures +meds **6 purchases**  
GE+ 1of 5 procedures +meds **3m**  
(colo/sigmo/pas/MRE/capsule)

GE y/n+ proc5 y/n+5ASA 3m  
GE y/n+ proc5 y/n+(5ASA/budeson 3m)  
GE y/n+ proc5 y/n+(5ASA/steroids 3m)  
GE y/n+ proc5 y/n+(5ASA/thiop 3m)  
GE y/n+ proc5 y/n+(5ASA/thiop/bio 3m)  
GE y/n+ proc5 y/n+thiop 3m  
GE y/n+ proc5 y/n+(thiop/bio) 3m  
GE y/n+ proc5+(thiop/MTX 3m)  
GE y/n+ proc5 y/n+MTX 3m  
GE y/n+ proc5 y/n+bio 3m  
GE y/n+ proc5 y/n+budeson 3m  
GE y/n+ proc5 y/n+(enema-ANY 2 purch+5ASA 3m)  
GE y/n+ proc5 y/n+(enema-ANY 2 purch+thiop 3m)

GE+ 1of 5 procedures +meds **3 purchases**  
GE+ meds **6m**

GE y/n+5ASA 6m  
GE y/n+(5ASA/budeson 6m)  
GE y/n+(5ASA/steroids 6m)  
GE y/n+(5ASA/thiop 6m)  
GE y/n+(5ASA/thiop/bio 6m)

|                                                               |                                                                                                                                                                                                                                                                                                                                                                                                                                                              |
|---------------------------------------------------------------|--------------------------------------------------------------------------------------------------------------------------------------------------------------------------------------------------------------------------------------------------------------------------------------------------------------------------------------------------------------------------------------------------------------------------------------------------------------|
|                                                               | <p>GE y/n+thiop 6m<br/> GE y/n+(thiop/bio 6m)<br/> GE y/n+ (thiop/MTX 6m)<br/> GE y/n+MTX 6m<br/> GE y/n+bio 6m<br/> GE y/n+budeson 6m<br/> GE y/n+enema-ANY 2 purchases<br/> GE y/n+(enema-ANY 2 purch+5ASA 6m)<br/> GE y/n+(enema-ANY 2 purch+thiop 6m)</p>                                                                                                                                                                                                |
| <p>GE+ meds <b>6 purchases</b></p>                            |                                                                                                                                                                                                                                                                                                                                                                                                                                                              |
| <p>GE+ meds <b>3m</b></p>                                     | <p>GE y/n+5ASA 3m<br/> GE y/n+(5ASA/budeson 3m)<br/> GE y/n+(5ASA/steroids 3m)<br/> GE y/n+(5ASA/thiop 3m)<br/> GE y/n+(5ASA/thiop/bio 3m)<br/> GE y/n+thiop 3m<br/> GE y/n+(thiop/bio 3m)<br/> GE y/n+ (thiop/MTX 3m)<br/> GE y/n+MTX 3m<br/> GE y/n+bio 3m<br/> GE y/n+budeson 3m<br/> GE y/n+(enema-ANY 2 purch+5ASA 3m)<br/> GE y/n+(enema-ANY 2 purch+thiop 3m)</p>                                                                                     |
| <p>GE+ meds <b>3 purchases</b><br/> at least 2 GE</p>         | <p>GE at least 2+enema-ANY at least 2 purchases<br/> GE at least 2+ proc3 y/n+ 2 purch enema<br/> GE at least 2+ proc3 at least 2+ 2 purch enema<br/> GE at least 2+ proc5 y/n+ 2 purch enema</p>                                                                                                                                                                                                                                                            |
| <p><b>1 of 3 procedures +meds 6m</b><br/> (colosigmo/pas)</p> | <p>proc3 y/n+5ASA 6m<br/> proc3 y/n+(5ASA/budeson 6m)<br/> proc3 y/n+(5ASA/steroids 6m)<br/> proc3 y/n+(5ASA/thiop 6m)<br/> proc3 y/n+(5ASA/thiop/bio 6m)<br/> proc3 y/n+thiop 6m<br/> proc3 y/n+(thiop/bio 6m)<br/> proc3 y/n+(thiop/MTX 6m)<br/> proc3 y/n+MTX 6m<br/> proc3 y/n+bio 6m<br/> proc3 y/n+budeson 6m<br/> proc3 y/n+enema-ANY at least 2 purchases<br/> proc3 y/n+(enema-ANY 2 purch+5ASA 6m)<br/> proc3 y/n+(enema-ANY 2 purch+thiop 6m)</p> |
| <p>1 of 3 procedures +meds <b>6 purchases</b></p>             |                                                                                                                                                                                                                                                                                                                                                                                                                                                              |
| <p>1 of 3 procedures +meds <b>3m</b><br/> (colosigmo/pas)</p> | <p>proc3 y/n+5ASA 3m<br/> proc3 y/n+(5ASA/budeson 3m)<br/> proc3 y/n+(5ASA/steroids 3m)<br/> proc3 y/n+(5ASA/thiop 3m)<br/> proc3 y/n+(5ASA/thiop/bio 3m)</p>                                                                                                                                                                                                                                                                                                |

|                                                                                                                       |                                                                                                                                                                                                                                                                                                                                                                                                                             |
|-----------------------------------------------------------------------------------------------------------------------|-----------------------------------------------------------------------------------------------------------------------------------------------------------------------------------------------------------------------------------------------------------------------------------------------------------------------------------------------------------------------------------------------------------------------------|
|                                                                                                                       | proc3 y/n+thiop 3m<br>proc3 y/n+(thiop/bio 3m)<br>proc3 y/n+(thiop/MTX 3m)<br>proc3 y/n+MTX 3m<br>proc3 y/n+bio 3m<br>proc3 y/n+budeson 3m<br>proc3 y/n+(enema-ANY 2 purch+5ASA 3m)<br>proc3 y/n+(enema-ANY 2 purch+thiop 3m)                                                                                                                                                                                               |
| 1 of 3 procedures +meds <b>3 purchases</b><br><b>1 of 5</b> procedures +meds <b>6m</b><br>(colosigmo/pas/MRE/capsule) | proc5 y/n+5ASA 6m<br>proc5 y/n+(5ASA/budeson 6m)<br>proc5 y/n+(5ASA/steroids 6m)<br>proc5 y/n+(5ASA/thiop 6m)<br>proc5 y/n+(5ASA/thiop/bio 6m)<br>proc5 y/n+thiop 6m<br>proc5 y/n+(thiop/bio 6m)<br>proc5 y/n+(thiop/MTX 6m)<br>proc5 y/n+MTX 6m<br>proc5 y/n+bio 6m<br>proc5 y/n+budeson 6m<br>proc5 y/n+enema-ANY at least 2 purchases<br>proc5 y/n+(enema-ANY 2 purch+5ASA 6m)<br>proc5 y/n+(enema-ANY 2 purch+thiop 6m) |
| 1 of 5 procedures +meds <b>6 purchases</b><br>1 of 5 procedures +meds <b>3m</b><br>(colosigmo/pas/MRE/capsule)        | proc5 y/n+5ASA 3m<br>proc5 y/n+(5ASA/budeson 3m)<br>proc5 y/n+(5ASA/steroids 3m)<br>proc5 y/n+(5ASA/thiop 3m)<br>proc5 y/n+(5ASA/thiop/bio 3m)<br>proc5 y/n+thiop 3m<br>proc5 y/n+(thiop/bio 3m)<br>proc5 y/n+(thiop/MTX 3m)<br>proc5 y/n+MTX 3m<br>proc5 y/n+bio 3m<br>proc5 y/n+budeson 3m<br>proc5 y/n+(enema-ANY 2 purch+5ASA 3m)<br>proc5 y/n+(enema-ANY 2 purch+thiop 3m)                                             |
| 1 of 5 procedures +meds <b>3 purchases</b>                                                                            |                                                                                                                                                                                                                                                                                                                                                                                                                             |

GE: gastroenterologist ; 5ASA: 5-aminosalicylic acid; 6m: 6 months; 3m: 3 months.

## Appendix 1: DETAILED IBD ALGORITHMS

### Prevalence Algorithm

The following combination of IBD diagnoses and medications best identify IBD patients:

1. If a subject has at least 5 diagnostic IBD codes (in Maccabi- 6)- classify as IBD.
2. If a subject has 1-4 diagnostic IBD codes (in Maccabi 1-5), and at least one of the following three conditions is present, classify as IBD:
  - a. Three purchases of any of the following medications: 5ASA, thiopurines, biologics (infliximab, adalimumab, golimumab and vedolizumab) and budesonide. Any combination of purchases is valid (e.g. 1 5ASA, 1 thiopurine, and 1 budesonide); **Or**
  - b. At least three month period between the first and last purchase of any of the above medications. Any combination may be considered (e.g. 1 month of 5ASA and 2 months of biologics). This condition includes those with only 2 purchases but with sufficient time interval period of at least 3 months; **Or**
  - c. Two purchases of enemas (steroids or 5ASA).

Final prevalence algorithm performance in the validation phase:

|          | Sensitivity | Specificity | PPV | NPV |
|----------|-------------|-------------|-----|-----|
| Clalit   | 83%         | 99%         | 87% | 99% |
| Maccabi  | 88%         | 99%         | 95% | 99% |
| Meuhedet | 92%         | 99%         | 94% | 99% |
| Leumit   | 95%         | 99%         | 90% | 99% |
| All      | 89%         | 99%         | 92% | 99% |

## **Incidence Algorithm**

An IBD case identified within the database was considered an incident case if:

1. First diagnosis date or first IBD medication purchase date (the earliest of the two) recorded in the databases occurred on or after 1.1.2015, in order to allow sufficient look-back period.
2. At least one year of membership within the HMO prior to first code/medication.

In the derivation cohort, dates in the databases were considered true index dates if they matched the "gold standard" chart reviewed dates with a margin of +/- 1 year.

Algorithm performance is demonstrated in the table below for three HMOs. This step was not completed in Clalit, as validation was achieved by examining the distribution of anemia, diarrhea and stomach pain codes around the proposed index date.

Final incidence algorithm performance in the validation phase:

|          | Sensitivity | specificity | PPV | NPV |
|----------|-------------|-------------|-----|-----|
| Maccabi  | 78%         | 83%         | 88% | 69% |
| Meuhedet | 81%         | 54%         | 68% | 70% |
| Leumit   | 95%         | 48%         | 84% | 77% |
| All      | 83%         | 68%         | 82% | 70% |

## **IBD type (CD/UC) Algorithm**

The majority of CD or UC specific codes out of the three most recent health-care contacts, or the most recent code when only one or two codes were available or when there was one CD, one UC and one IBD diagnosis.

Final IBD type algorithm performance in the validation phase:

|          | Sensitivity | Specificity | PPV | NPV |
|----------|-------------|-------------|-----|-----|
| Clalit   | 92%         | 97%         | 97% | 92% |
| Maccabi  | 96%         | 95%         | 96% | 95% |
| Meuhedet | 90%         | 97%         | 96% | 92% |
| Leumit   | 86%         | 99%         | 99% | 82% |
| All      | 92%         | 97%         | 97% | 92% |
